# Supplementary material
Source: PubMed Central journal article supplement (PMC7254492)
Supplement: NIHMS1589597-supplement-1.pdf [file NIHMS1589597-supplement-1.pdf]

# Supplementary material

Prieto et al. (2019)

## Contents:

**Fig. S1.** The expression of *PHO89* does not vary in cold-shocked cells of the *plc1* and *pho85* mutants.

**Fig. S2.** Cold stimulates the expression of UAS<sub>INO</sub> sequences containing genes.

**Table S1.** The *Saccharomyces cerevisiae* strains used in this study.

**Table S2.** The oligonucleotides used in this study.

**Table S3.** The plasmids used in this study.

**Table S4.** Composition, total carbon length and total double bond of TAG molecular species found in *S. cerevisiae* wild-type cells grown at 30°C and cold-shocked at 15°C for 3 h.

**Table S5.** Composition, total carbon length and total double bond of SE molecular species found in *S. cerevisiae* wild-type cells grown at 30°C and cold-shocked at 15°C for 3 h.

**Table S6.** Composition, total carbon length and total double bond of DAG molecular species found in *S. cerevisiae* wild-type cells grown at 30°C and cold-shocked at 15°C for 3 h.

**Table S7.** Composition, total carbon length and total double bond of PA molecular species found in *S. cerevisiae* wild-type cells grown at 30°C and cold-shocked at 15°C for 3 h.

**Table S8.** Composition, total carbon length and total double bond of PC molecular species found in *S. cerevisiae* wild-type cells grown at 30°C and cold-shocked at 15°C for 3 h.

**Table S9.** Composition, total carbon length and total double bond of PE molecular species found in *S. cerevisiae* wild-type cells grown at 30°C and cold-shocked at 15°C for 3 h.

**Table S10.** Composition, total carbon length and total double bond of PG molecular species found in *S. cerevisiae* wild-type cells grown at 30°C and cold-shocked at 15°C for 3 h.

**Table S11.** Composition, total carbon length and total double bond of PI molecular species found in *S. cerevisiae* wild-type cells grown at 30°C and cold-shocked at 15°C for 3 h.

**Table S12.** Composition, total carbon length and total double bond of PS molecular species found in *S. cerevisiae* wild-type cells grown at 30°C and cold-shocked at 15°C for 3 h.

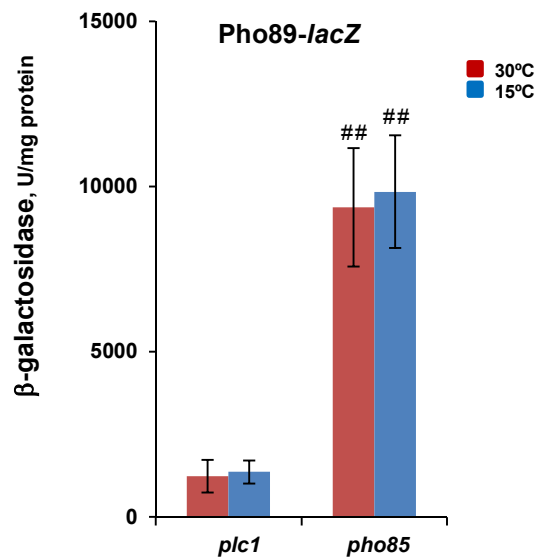

**Fig. S1.** The expression of *PHO89* does not vary in cold-shocked cells of the *plc1* and *pho85* mutants. *PHO89::lacZ* transformants of the CEN.PK2-1C mutants *plc1* and *pho85* were grown at 30°C in SCD, transferred to 15°C for 3 h, and the  $\beta$ -galactosidase activity of cellular extracts was analyzed as indicated in the Materials and methods section. Data represent the mean value ( $\pm$  SD) of three independent experiments. Activity differences between *plc1* and *pho85* samples were statistically significant at both 30 and 15°C (##;  $p < 0.01$ ).

**A**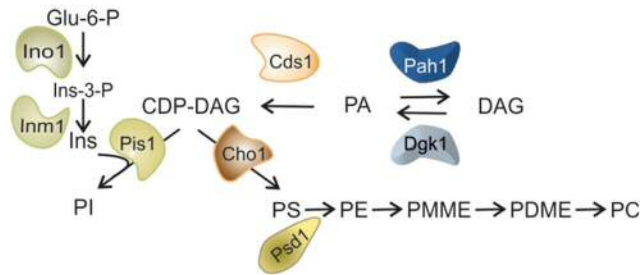**B**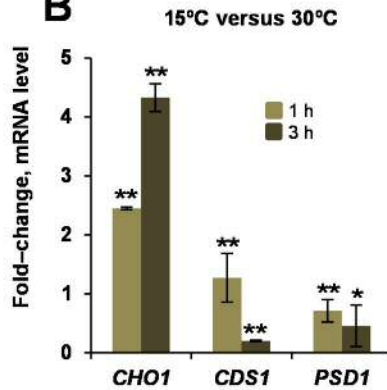

**Fig. S2.** Cold stimulates the expression of UAS<sub>INO</sub> sequences containing genes. A) Schematic representation of pathways in which the phospholipid biosynthetic genes *CHO1*, which encodes the phosphatidylserine synthase, *CDS1*, the yeast CDP-diacylglycerol synthase and *PSD1*, encoding the phosphatidylserine decarboxylase, are involved. Details are given in the text and reviews [79]. B) Cells of the CEN.PK2-1C wild-type (wt) strain were grown to the mid-logarithmic phase in SCD medium at 30°C. An aliquot was withdrawn for the analysis and the rest of the culture was shifted to 15°C for 1 h or 3 h. Samples were analyzed for total mRNA levels of the mentioned genes by qPCR as indicated in the Materials and methods section. Expression differences between control (30°C) and cold-treated (15°C) samples are represented as the fold-change (\*;  $p < 0.05$ ) (\*\*;  $p < 0.01$ ). Data represent the mean ( $\pm$  SD) of at least three independent experiments.

**Table S1.** The *Saccharomyces cerevisiae* strains used in this study

| Strain                           | Genotype                                                                                  | Reference or source |
|----------------------------------|-------------------------------------------------------------------------------------------|---------------------|
| CEN.PK2-1C                       | <i>MATa ura3-52 his3-Δ1 leu-2-3,112 trp1-289</i>                                          | M. Rose             |
| CEN.PK2-1C <i>inp51</i>          | CEN.PK2-1C <i>inp51::natMX4</i>                                                           | [4]                 |
| CEN.PK2-1C <i>plc1</i>           | CEN.PK2-1C <i>plc1::kanMX4</i>                                                            | This study          |
| CEN.PK2-1C <i>vip1</i>           | CEN.PK2-1C <i>vip1::hygMX4</i>                                                            | [4]                 |
| CEN.PK2-1C <i>pho85</i>          | CEN.PK2-1C <i>pho85::hygMX4</i>                                                           | [4]                 |
| CEN.PK2-1C Pah1-Myc              | CEN.PK2-1C <i>PAH1-13myc::His3MX6</i>                                                     | [4]                 |
| CEN.PK2-1C Ypk1-HA               | CEN.PK2-1C <i>YPK1-3HA::His3MX6</i>                                                       | This study          |
| CEN.PK2-1C Orm2-HA               | CEN.PK2-1C <i>ORM2-3HA::His3MX6</i>                                                       | This study          |
| CEN.PK2-1C <i>pho85</i> Pah1-Myc | CEN.PK2-1C <i>pho85::hygMX4 PAH1-13myc::His3MX6</i>                                       | This study          |
| CEN.PK2-1C <i>pho85</i> Ypk1-HA  | CEN.PK2-1C <i>pho85::hygMX4 YPK1-3HA::His3MX6</i>                                         | This study          |
| CEN.PK2-1C <i>pho85</i> Orm2-HA  | CEN.PK2-1C <i>pho85::hygMX4 ORM2-3HA::His3MX6</i>                                         | This study          |
| KKT268 Ypk1-HA                   | <i>MATa LYS2 ura3Δ0 his3Δ1 leu2Δ0 MET15 fpk1Δ::HphMX4 fpk2Δ::KanMX6 YPK1-3HA::His3MX6</i> | [98]                |

[98] Nakano K, Yamamoto T, Kishimoto T, Noji T, Tanaka K (2008) Protein kinases Fpk1p and Fpk2p are novel regulators of phospholipid asymmetry. *Mol Biol Cell* 19: 1783-1797.

**Table S2.** The oligonucleotides used in this study

| Name    | Sequence                                                                   | Used for                                         |
|---------|----------------------------------------------------------------------------|--------------------------------------------------|
| KAN-S2  | GTCAAGGAGGGTATTCTGG                                                        | Verification integration                         |
| YPK1-F2 | ACAGCTAGGTAGCTCAATGGTGCAAGGTAGAAGCATTAGA<br>CGGATCCCCGGGTTAATTAA           | Genetic fusion of <i>HA</i> to <i>YPK1</i>       |
| YPK1-R1 | AAATTGCGCCATTGGTACAGTTGCTTCATCTTGAACACAG<br>GAATTCGAGCTCGTTTAAAC           | Genetic fusion of <i>HA</i> to <i>YPK1</i>       |
| YPK1-V  | ATTTGGTGGCTGGACATACG                                                       | Verification fusion of <i>HA</i> to <i>YPK1</i>  |
| ORM2-F2 | GAATATCCATCCCTGGTATTACGGGCCGTGCTCAAATTAGT<br>CGGATCCCCGGGTTAATTAA          | Genetic fusion of <i>HA</i> to <i>ORM2</i>       |
| ORM2-R1 | ACATATATATATATATATATATACATATATATGCGTATAGGCA<br>GAGCCAAGAATTCGAGCTCGTTTAAAC | Genetic fusion of <i>HA</i> to <i>ORM2</i>       |
| ORM2-V  | CTGGGAATTACGCATAGA                                                         | Verification fusion of <i>HA</i> to <i>ORM2</i>  |
| PAH1-F2 | AATTCGATGACGATGAATTCGACGAAGATGAATTCGAAGATC<br>GGATCCCCGGGTTAATTAA          | Genetic fusion of <i>MYC</i> to <i>PAH1</i>      |
| PAH1-R1 | AGTATGGATCGTTATAAATAATATTCGGCTACAAGAATCGAA<br>TTCGAGCTCGTTTAAAC            | Genetic fusion of <i>MYC</i> to <i>PAH1</i>      |
| PAH1-V  | CACGAAGGGAGCAAAGTG                                                         | Verification fusion of <i>MYC</i> to <i>PAH1</i> |
| PLC1-F1 | TAAACGTACAACGGTAAGGTCATTCACGCAGTGTATATGCGTA<br>CGCTGCAGGTCGAC              | <i>PLC1</i> disruption                           |
| PLC1-R1 | TGTATTGTTCCCCCTCCATGTTAAACAACGGAATGTGACGATC<br>GATGAATTCGAGCTC             | <i>PLC1</i> disruption                           |
| PLC1-V1 | ACAGTTACTTTCACCAAGAG                                                       | Verification <i>PLC1</i> disruption              |
| ACT1-F  | GGATCTTCTACTACATCAGC                                                       | Quantification by qRT-PCR of <i>ACT1</i> mRNA    |
| ACT1-R  | CACATAACCAGAACC GTTATC                                                     | Quantification by qRT-PCR of <i>ACT1</i> mRNA    |
| INO1-F  | ATTGCTCCAATCACCTCCG                                                        | Quantification by qRT-PCR of <i>INO1</i> mRNA    |
| INO1-R  | CCGAAGTAGTTTGGTTGC                                                         | Quantification by qRT-PCR of <i>INO1</i> mRNA    |
| ORM2-F  | TGAAGAGTCTCCGCTTACC                                                        | Quantification by qRT-PCR of <i>ORM2</i> mRNA    |
| ORM2-R  | TCCATTTGGGCGTCGACC                                                         | Quantification by qRT-PCR of <i>ORM2</i> mRNA    |
| LCB3-F  | AGCATTGGTGGTTTCCTTTG                                                       | Quantification by qRT-PCR of <i>LCB3</i> mRNA    |
| LCB3-R  | CCAGGGTGACTCCAAACACT                                                       | Quantification by qRT-PCR of <i>LCB3</i> mRNA    |
| LCB4-F  | TCGTCAAATATGCTGCCAAA                                                       | Quantification by qRT-PCR of <i>LCB4</i> mRNA    |
| LCB4-R  | AGGTACTGGTTCCGTCATCG                                                       | Quantification by qRT-PCR of <i>LCB4</i> mRNA    |
| LCB5-F  | GCCACTGGACAAACAATCCT                                                       | Quantification by qRT-PCR of <i>LCB5</i> mRNA    |
| LCB5-R  | ACCCAATTCAAACCTTG CAG                                                      | Quantification by qRT-PCR of <i>LCB5</i> mRNA    |
| YSR3-F  | ACTGGTATGGCCAACAAAGC                                                       | Quantification by qRT-PCR of <i>YSR3</i> mRNA    |
| YSR3-R  | AAACAAGCCCCATGCTACAC                                                       | Quantification by qRT-PCR of <i>YSR3</i> mRNA    |
| DPL1-F  | TAGTCGGTGCAGCAATGAAG                                                       | Quantification by qRT-PCR of <i>DPL1</i> mRNA    |
| DPL1-R  | GGCTTTTGTAGGGCATTGAA                                                       | Quantification by qRT-PCR of <i>DPL1</i> mRNA    |

**Table S3.** The plasmids used in this study

| Plasmid                  | Description                                                                                                                               | Source or reference |
|--------------------------|-------------------------------------------------------------------------------------------------------------------------------------------|---------------------|
| pFA6a-kanMX4             | pFA-yeast plasmid containing the <i>kan<sup>r</sup></i> gene, which provide resistance to the drug geneticine. kanMX4 cassette template   | [99]                |
| pFA6a-3HA-His3MX6        | pFA6a-His3MX6-derived plasmid containing sequences encoding 3 tandem repeats of the influenza virus hemagglutinin epitope                 | [49]                |
| pPHO89:: <i>lacZ</i>     | Plasmid that contains the <i>E. coli lacZ</i> gene under the control of the <i>PHO89</i> gene promoter.                                   | [93]                |
| pRS414-7x2-PHO5-GFP-hPLC | Plasmid that contains two repeats of Phospholipase C $\delta 1$ PH-domain fused to GFP under the control of the <i>PHO5</i> gene promoter | Tim Levine          |

[99] Wach A, Brachat A, Pöhlmann R, Philippsen P (1994) New heterologous modules for classical or PCR-based gene disruptions in *Saccharomyces cerevisiae*. *Yeast* 10: 1793-1808.

**TABLE S4.** Composition, total carbon length and total double bond of TAG molecular species found in *S. cerevisiae* wild-type cells grown at 30°C and cold-shocked at 15°C for 3 h.

| TAG species                | mol% ± SD <sup>a</sup> |                |
|----------------------------|------------------------|----------------|
|                            | 30°C                   | 15°C           |
| C38:0                      | 0.12 ± 0.07            | nd             |
| C38:1                      | 0.15 ± 0.01            | 0.06 ± 0.03    |
| C40:0                      | 0.23 ± 0.06            | 0.11 ± 0.02*   |
| C40:1                      | 0.56 ± 0.05            | 0.31 ± 0.01**  |
| C42:0                      | 0.36 ± 0.09            | 0.28 ± 0.03    |
| C42:1                      | 1.77 ± 0.07            | 1.37 ± 0.06*   |
| C42:2                      | 1.87 ± 0.05            | 0.99 ± 0.01**  |
| C44:0                      | 0.41 ± 0.18            | 0.31 ± 0.18    |
| C44:1                      | 2.41 ± 0.02            | 2.44 ± 0.06    |
| C44:2                      | 3.88 ± 0.04            | 2.61 ± 0.06**  |
| C44:3                      | 0.14 ± 0.01            | nd             |
| C46:1                      | 1.95 ± 0.08            | 2.07 ± 0.02*   |
| C46:2                      | 5.47 ± 0.09            | 4.35 ± 0.05**  |
| C46:3                      | 1.87 ± 0.02            | 0.97 ± 0.02**  |
| C48:1                      | 1.76 ± 0.15            | 1.93 ± 0.03    |
| C48:2                      | 9.91 ± 0.16            | 9.75 ± 0.09    |
| C48:3                      | 13.63 ± 0.14           | 12.02 ± 0.10** |
| C50:2                      | 9.88 ± 0.10            | 11.35 ± 0.05** |
| C50:3                      | 22.57 ± 0.23           | 23.37 ± 0.39   |
| C52:2                      | 5.29 ± 0.09            | 7.05 ± 0.63*   |
| C52:3                      | 10.87 ± 0.17           | 13.45 ± 0.19** |
| C54:2                      | 1.63 ± 0.03            | 2.19 ± 0.08**  |
| C54:3                      | 1.32 ± 0.07            | 1.68 ± 0.03**  |
| C56:1                      | 0.21 ± 0.12            | 0.20 ± 0.02    |
| C56:2                      | 0.34 ± 0.02            | 0.32 ± 0.01    |
| C56:3                      | 0.17 ± 0.04            | 0.15 ± 0.09    |
| C58:2                      | 0.58 ± 0.01            | 0.49 ± 0.03*   |
| C60:2                      | 0.73 ± 0.05            | 0.57 ± 0.33*   |
| <b>Total carbon length</b> |                        |                |
| C38                        | 0.27 ± 0.07            | 0.06 ± 0.03    |
| C40                        | 0.78 ± 0.10            | 0.42 ± 0.01*   |
| C42                        | 4.00 ± 0.19            | 2.64 ± 0.03**  |
| C44                        | 6.84 ± 0.20            | 5.25 ± 0.12**  |
| C46                        | 9.29 ± 0.01            | 7.38 ± 0.09**  |
| C48                        | 25.30 ± 0.23           | 23.71 ± 0.21** |
| C50                        | 32.45 ± 0.29           | 34.72 ± 0.43*  |
| C52                        | 16.16 ± 0.20           | 20.51 ± 0.45** |
| C54                        | 2.95 ± 0.03            | 3.87 ± 0.06**  |
| C56                        | 0.65 ± 0.11            | 0.62 ± 0.10    |
| C58                        | 0.58 ± 0.01            | 0.49 ± 0.03*   |
| C60                        | 0.01 ± 0.00            | nd             |
| <b>Total double bond</b>   |                        |                |
| C:0                        | 1.12 ± 0.39            | 0.59 ± 0.16    |
| C:1                        | 8.73 ± 0.23            | 8.34 ± 0.16*   |
| C:2                        | 39.58 ± 0.32           | 39.48 ± 0.75   |
| C:3                        | 50.57 ± 0.31           | 51.59 ± 0.74   |

<sup>a</sup>Values are mean ± SD of 3 independent replicates. Significance level: \*  $p < 0.05$ ; \*\*  $p < 0.01$ . nd, non detected.

**TABLE S5.** Composition, total carbon length and total double bond of SE molecular species found in *S. cerevisiae* wild-type cells grown at 30°C and cold-shocked at 15°C for 3 h.

| SE species                      | mol% ± SD <sup>a</sup> |                |
|---------------------------------|------------------------|----------------|
|                                 | 30°C                   | 15°C           |
| C10:0                           | 0.24 ± 0.01            | 0.4 ± 0.03*    |
| C12:0                           | 0.71 ± 0.06            | 1.02 ± 0.13*   |
| C14:0                           | 0.99 ± 0.05            | 1.50 ± 0.10**  |
| C14:1                           | 0.82 ± 0.04            | 1.35 ± 0.05**  |
| C16:0                           | 12.70 ± 0.18           | 16.18 ± 0.02*  |
| C16:1                           | 43.19 ± 0.43           | 52.83 ± 6.57   |
| C18:0                           | 8.36 ± 0.11            | 7.4 ± 1.08     |
| C18:1                           | 32.04 ± 0.33           | 24.31 ± 2.15*  |
| C20:0                           | 0.95 ± 0.07            | 0.81 ± 0.11*   |
| <hr/> Total carbon length <hr/> |                        |                |
| C10                             | 0.24 ± 0.01            | 0.40 ± 0.03*   |
| C12                             | 0.71 ± 0.06            | 1.02 ± 0.13*   |
| C14                             | 1.80 ± 0.05            | 2.85 ± 0.13**  |
| C16                             | 55.89 ± 0.40           | 63.62 ± 2.77*  |
| C18                             | 40.40 ± 0.40           | 31.71 ± 3.22*  |
| C20                             | 0.95 ± 0.07            | 0.81 ± 0.11    |
| <hr/> Total double bond <hr/>   |                        |                |
| C:0                             | 23.95 ± 0.30           | 26.57 ± 0.27** |
| C:1                             | 76.05 ± 0.30           | 73.43 ± 0.27** |

<sup>a</sup>Values are mean ± SD of 3 independent replicates. Significance level: \*  $p < 0.05$ ; \*\*  $p < 0.01$ . nd, non detected.



**TABLE S6.** Composition, total carbon length and total double bond of DAG molecular species found in *S. cerevisiae* wild-type cells grown at 30°C and cold-shocked at 15°C for 3 h.

| DAG species                | mol% $\pm$ SD <sup>a</sup> |                    |
|----------------------------|----------------------------|--------------------|
|                            | 30°C                       | 15°C               |
| C30:0                      | 0.94 $\pm$ 0.04            | 1.27 $\pm$ 0.68    |
| C30:1                      | 2.35 $\pm$ 0.09            | 4.47 $\pm$ 0.06**  |
| C30:2                      | 0.51 $\pm$ 0.04            | 1.76 $\pm$ 0.12**  |
| C32:1                      | 13.07 $\pm$ 0.09           | 13.95 $\pm$ 0.17*  |
| C32:2                      | 24.12 $\pm$ 0.38           | 22.69 $\pm$ 0.25*  |
| C34:1                      | 18.77 $\pm$ 0.08           | 15.33 $\pm$ 0.10** |
| C34:2                      | 30.21 $\pm$ 0.30           | 31.11 $\pm$ 1.19   |
| C36:0                      | 6.26 $\pm$ 0.01            | 6.01 $\pm$ 0.80    |
| C36:1                      | 3.08 $\pm$ 0.05            | 3.02 $\pm$ 0.04    |
| C42:1                      | 1.02 $\pm$ 0.59            | 1.19 $\pm$ 0.69    |
| <b>Total carbon length</b> |                            |                    |
| C30                        | 3.80 $\pm$ 0.10            | 7.50 $\pm$ 0.79*   |
| C32                        | 37.19 $\pm$ 0.44           | 36.65 $\pm$ 0.16   |
| C34                        | 48.98 $\pm$ 0.27           | 46.43 $\pm$ 1.26*  |
| C36                        | 9.34 $\pm$ 0.06            | 9.03 $\pm$ 0.77    |
| C42                        | 0.68 $\pm$ 0.59            | 0.40 $\pm$ 0.69    |
| <b>Total double bond</b>   |                            |                    |
| C:0                        | 0.94 $\pm$ 0.04            | 1.27 $\pm$ 0.68    |
| C:1                        | 41.13 $\pm$ 0.51           | 40.15 $\pm$ 0.89*  |
| C:2                        | 57.94 $\pm$ 0.55           | 58.58 $\pm$ 1.36   |

<sup>a</sup>Values are mean  $\pm$  SD of 3 independent replicates. Significance level: \*  $p < 0.05$ ; \*\*  $p < 0.01$ . nd, non detected.

**TABLE S7.** Composition, total carbon length and total double bond of PA molecular species found in *S. cerevisiae* wild-type cells grown at 30°C and cold-shocked at 15°C for 3 h.

| PA species                 | mol% ± SD <sup>a</sup> |               |
|----------------------------|------------------------|---------------|
|                            | 30°C                   | 15°C          |
| C28:1                      | 1.45 ± 0.22            | 2.03 ± 0.23   |
| C30:1                      | 2.34 ± 0.20            | 3.03 ± 0.27** |
| C30:2                      | 0.86 ± 0.50            | 1.68 ± 0.46   |
| C32:1                      | 11.54 ± 0.41           | 12.67 ± 0.35  |
| C32:2                      | 23.41 ± 0.63           | 24.21 ± 1.87  |
| C34:1                      | 19.34 ± 0.90           | 15.94 ± 1.24* |
| C34:2                      | 39.89 ± 0.46           | 39.07 ± 1.18  |
| C36:2                      | 1.46 ± 0.10            | 1.39 ± 0.22   |
| <b>Total carbon length</b> |                        |               |
| C28                        | 1.12 ± 0.25            | 1.92 ± 0.76   |
| C30                        | 2.92 ± 0.51            | 4.7 ± 0.71*   |
| C32                        | 34.94 ± 0.57           | 36.87 ± 1.52  |
| C34                        | 59.23 ± 1.06           | 55.01 ± 2.38  |
| C36                        | 1.46 ± 0.10            | 1.39 ± 0.22   |
| <b>Total double bond</b>   |                        |               |
| C:0                        | nd                     | nd            |
| C:1                        | 34.67 ± 1.08           | 33.66 ± 1.15  |
| C:2                        | 65.33 ± 1.08           | 66.34 ± 1.15  |

<sup>a</sup>Values are mean ± SD of 3 independent replicates. Significance level: \*  $p < 0.05$ ; \*\*  $p < 0.01$ . nd, non detected.

**TABLE S8.** Composition, total carbon length and total double bond of PC molecular species found in *S. cerevisiae* wild-type cells grown at 30°C and cold-shocked at 15°C for 3 h.

| PC species                 | mol% ± SD <sup>a</sup> |                |
|----------------------------|------------------------|----------------|
|                            | 30°C                   | 15°C           |
| C28:0                      | 0.27 ± 0.01            | nd             |
| C28:1                      | 3.26 ± 0.15            | 2.83 ± 0.13*   |
| C28:2                      | 0.06 ± 0.03            | 0.07 ± 0.04    |
| C30:0                      | 0.11 ± 0.02            | nd             |
| C30:1                      | 2.66 ± 0.04            | 1.54 ± 0.04**  |
| C30:2                      | 1.65 ± 0.04            | 2.19 ± 0.03**  |
| C32:1                      | 6.22 ± 0.07            | 1.69 ± 0.15**  |
| C32:2                      | 39.66 ± 0.07           | 45.66 ± 0.42** |
| C34:1                      | 3.6 ± 0.08             | 0.54 ± 0.13**  |
| C34:2                      | 38.99 ± 0.21           | 42.87 ± 0.23** |
| C36:1                      | 0.61 ± 0.01            | 0.07 ± 0.04**  |
| C36:2                      | 2.90 ± 0.04            | 2.60 ± 0.03**  |
| C38:2                      | 0.06 ± 0.03            | nd             |
| <b>Total carbon length</b> |                        |                |
| C28                        | 3.56 ± 0.16            | 2.88 ± 0.16*   |
| C30                        | 4.42 ± 0.02            | 3.72 ± 0.05**  |
| C32                        | 45.88 ± 0.04           | 47.34 ± 0.31** |
| C34                        | 42.59 ± 0.18           | 43.41 ± 0.14** |
| C36                        | 3.51 ± 0.05            | 2.65 ± 0.07**  |
| C38                        | 0.04 ± 0.03            | nd             |
| <b>Total double bond</b>   |                        |                |
| C:0                        | 0.38 ± 0.03            | nd             |
| C:1                        | 16.35 ± 0.29           | 6.65 ± 0.47**  |
| C:2                        | 83.27 ± 0.28           | 93.35 ± 0.47** |

<sup>a</sup>Values are mean ± SD of 3 independent replicates. Significance level: \*  $p < 0.05$ ; \*\*  $p < 0.01$ . nd, non detected.

**TABLE S9.** Composition, total carbon length and total double bond of PE molecular species found in *S. cerevisiae* wild-type cells grown at 30°C and cold-shocked at 15°C for 3 h.

| PE species                 | mol% ± SD <sup>a</sup> |                |
|----------------------------|------------------------|----------------|
|                            | 30°C                   | 15°C           |
| C26:0                      | 0.11 ± 0.01            | 0.08 ± 0.01    |
| C26:1                      | 0.13 ± 0.01            | 0.17 ± 0.02*   |
| C28:0                      | 0.25 ± 0.02            | 0.17 ± 0.00**  |
| C28:1                      | 0.82 ± 0.04            | 0.91 ± 0.07    |
| C30:1                      | 1.51 ± 0.00            | 1.49 ± 0.01*   |
| C30:2                      | 0.37 ± 0.02            | 0.72 ± 0.02**  |
| C32:1                      | 9.52 ± 0.17            | 8.96 ± 0.05*   |
| C32:2                      | 23.83 ± 0.12           | 22.13 ± 0.26** |
| C34:1                      | 10.75 ± 0.02           | 10.26 ± 0.09** |
| C34:2                      | 48.45 ± 0.36           | 50.92 ± 0.36*  |
| C36:2                      | 4.12 ± 0.12            | 4.14 ± 0.03    |
| C38:2                      | 0.13 ± 0.01            | 0.09 ± 0.05    |
| <b>Total carbon length</b> |                        |                |
| C26                        | 0.24 ± 0.01            | 0.24 ± 0.02    |
| C28                        | 1.07 ± 0.05            | 1.08 ± 0.07    |
| C30                        | 1.88 ± 0.02            | 2.21 ± 0.01**  |
| C32                        | 33.35 ± 0.19           | 31.09 ± 0.31** |
| C34                        | 59.21 ± 0.34           | 61.18 ± 0.42*  |
| C36                        | 4.12 ± 0.12            | 4.14 ± 0.03    |
| C38                        | 0.13 ± 0.01            | 0.06 ± 0.05    |
| <b>Total double bond</b>   |                        |                |
| C:0                        | 0.36 ± 0.02            | 0.25 ± 0.01    |
| C:1                        | 22.74 ± 0.23           | 21.79 ± 0.08*  |
| C:2                        | 76.90 ± 0.23           | 77.96 ± 0.08*  |

<sup>a</sup>Values are mean ± SD of 3 independent replicates. Significance level: \*  $p < 0.05$ ; \*\*  $p < 0.01$ . nd, non detected.

**TABLE S10.** Composition, total carbon length and total double bond of PG molecular species found in *S. cerevisiae* wild-type cells grown at 30°C and cold-shocked at 15°C for 3 h.

| PG species                 | mol% $\pm$ SD <sup>a</sup> |                    |
|----------------------------|----------------------------|--------------------|
|                            | 30°C                       | 15°C               |
| C32:1                      | 26.94 $\pm$ 3.13           | 27.77 $\pm$ 0.47   |
| C32:2                      | 6.82 $\pm$ 3.94            | 14.02 $\pm$ 0.53   |
| C34:1                      | 55.38 $\pm$ 1.26           | 34.79 $\pm$ 0.13** |
| C34:2                      | 15.41 $\pm$ 1.81           | 23.41 $\pm$ 0.92** |
| <b>Total carbon length</b> |                            |                    |
| C32                        | 29.21 $\pm$ 1.41           | 41.80 $\pm$ 0.94** |
| C34                        | 70.79 $\pm$ 1.41           | 58.20 $\pm$ 0.94** |
| <b>Total double bond</b>   |                            |                    |
| C:1                        | 82.32 $\pm$ 2.13           | 62.57 $\pm$ 0.41** |
| C:2                        | 17.68 $\pm$ 2.13           | 37.43 $\pm$ 0.41** |

<sup>a</sup>Values are mean  $\pm$  SD of 3 independent replicates. Significance level: \*  $p < 0.05$ ; \*\*  $p < 0.01$ . nd, non detected.

**TABLE S11.** Composition, total carbon length and total double bond of PI molecular species found in *S. cerevisiae* wild-type cells grown at 30°C and cold-shocked at 15°C for 3 h.

| PI species                 | mol% ± SD <sup>a</sup> |                |
|----------------------------|------------------------|----------------|
|                            | 30°C                   | 15°C           |
| C24:0                      | 0.13 ± 0.07            | 0.33 ± 0.02    |
| C26:0                      | 2.74 ± 0.14            | 3.83 ± 0.09**  |
| C26:1                      | 0.37 ± 0.02            | 1.13 ± 0.02**  |
| C28:0                      | 4.68 ± 0.13            | 4.75 ± 0.14*   |
| C28:1                      | 0.86 ± 0.05            | 2.62 ± 0.07**  |
| C30:0                      | 1.74 ± 0.01            | 0.92 ± 0.01**  |
| C30:1                      | 2.84 ± 0.08            | 5.42 ± 0.09**  |
| C30:2                      | 0.26 ± 0.00            | 1.27 ± 0.02**  |
| C32:1                      | 22.37 ± 0.15           | 23.85 ± 0.08** |
| C32:2                      | 4.76 ± 0.13            | 7.10 ± 0.02**  |
| C34:1                      | 40.72 ± 0.46           | 31.34 ± 0.25** |
| C34:2                      | 8.31 ± 0.09            | 9.57 ± 0.08**  |
| C36:1                      | 9.35 ± 0.32            | 6.86 ± 0.10**  |
| C36:2                      | 0.95 ± 0.01            | 1.01 ± 0.02*   |
| <b>Total carbon length</b> |                        |                |
| C24                        | 0.13 ± 0.07            | 0.33 ± 0.02    |
| C26                        | 3.11 ± 0.16            | 4.97 ± 0.10**  |
| C28                        | 5.54 ± 0.17            | 7.37 ± 0.20**  |
| C30                        | 4.84 ± 0.08            | 7.6 ± 0.12**   |
| C32                        | 27.13 ± 0.21           | 30.95 ± 0.08** |
| C34                        | 49.03 ± 0.39           | 40.91 ± 0.28** |
| C36                        | 10.30 ± 0.32           | 7.87 ± 0.09**  |
| <b>Total double bond</b>   |                        |                |
| C:0                        | 9.21 ± 0.33            | 9.84 ± 0.24**  |
| C:1                        | 76.51 ± 0.50           | 71.22 ± 0.24** |
| C:2                        | 14.29 ± 0.21           | 18.94 ± 0.03** |

<sup>a</sup>Values are mean ± SD of 3 independent replicates. Significance level: \*  $p < 0.05$ ; \*\*  $p < 0.01$ . nd, non detected.

**TABLE S12.** Composition, total carbon length and total double bond of PS molecular species found in *S. cerevisiae* wild-type cells grown at 30°C and cold-shocked at 15°C for 3 h.

| PS species                 | mol% ± SD <sup>a</sup> |                |
|----------------------------|------------------------|----------------|
|                            | 30°C                   | 15°C           |
| C26:0                      | nd                     | 0.53 ± 0.03    |
| C28:0                      | 0.44 ± 0.07            | 0.57 ± 0.02    |
| C28:1                      | 0.53 ± 0.04            | 1.21 ± 0.06**  |
| C30:1                      | 1.18 ± 0.09            | 2.40 ± 0.06**  |
| C32:1                      | 13.64 ± 0.29           | 17.97 ± 0.32** |
| C32:2                      | 6.83 ± 0.09            | 8.93 ± 0.30**  |
| C34:1                      | 33.89 ± 0.62           | 29.59 ± 0.79*  |
| C34:2                      | 41.64 ± 0.79           | 35.37 ± 0.82*  |
| C36:1                      | 0.58 ± 0.05            | 1.10 ± 0.21*   |
| C36:2                      | 1.46 ± 0.12            | 2.53 ± 0.34*   |
| <b>Total carbon length</b> |                        |                |
| C26                        | nd                     | 0.53 ± 0.03    |
| C28                        | 0.93 ± 0.10            | 1.81 ± 0.01    |
| C30                        | 1.18 ± 0.09            | 2.40 ± 0.06**  |
| C32                        | 20.46 ± 0.36           | 26.90 ± 0.07** |
| C34                        | 75.53 ± 0.18           | 64.96 ± 0.62** |
| C36                        | 2.04 ± 0.12            | 3.62 ± 0.46*   |
| <b>Total double bond</b>   |                        |                |
| C:0                        | 0.44 ± 0.07            | 0.91 ± 0.32*   |
| C:1                        | 49.64 ± 0.65           | 52.26 ± 1.27   |
| C:2                        | 49.93 ± 0.70           | 46.82 ± 0.97*  |

<sup>a</sup>Values are mean ± SD of 3 independent replicates. Significance level: \*  $p < 0.05$ ; \*\*  $p < 0.01$ . nd, non detected.
